# Supplementary material
Source: PubMed Central journal article supplement (PMC4303519)
Supplement: NIHMS633098-supplement-Supplemental_Material.pdf [file NIHMS633098-supplement-Supplemental_Material.pdf]

## Supplemental Material

**Table S1: Pediatric Subject Characteristics and Analyses**

| ID                                                                  | Patient Characteristics |       |                                  |        | Medications |                    |         |         |              |          |                 | Analyses |     |     |
|---------------------------------------------------------------------|-------------------------|-------|----------------------------------|--------|-------------|--------------------|---------|---------|--------------|----------|-----------------|----------|-----|-----|
|                                                                     | Group                   | Sex   | Age at Tissue Collection (years) | EF/FS  | PDEi        | Non-PDEi Inotrope* | Digoxin | ACEi    | Beta-Blocker | Diuretic | Anti-arrhythmic | cAMP     | PDE | PLB |
| <b>Non-Failing (n=10)</b>                                           |                         |       |                                  |        |             |                    |         |         |              |          |                 |          |     |     |
| 1                                                                   | NF                      | F     | 1.3                              | EF 49% | N           | Y                  | N       | N       | N            | N        | N               | X        | X   | X   |
| 2                                                                   | NF                      | M     | 1.4                              | NA     | N           | N                  | N       | N       | N            | N        | N               | X        | X   | X   |
| 3                                                                   | NF                      | F     | 3                                | EF 57% | N           | Y                  | N       | N       | N            | N        | N               | X        | X   | X   |
| 4                                                                   | NF                      | M     | 7                                | EF 63% | N           | Y                  | N       | N       | N            | N        | N               | X        | X   | X   |
| 5                                                                   | NF                      | M     | 7                                | NA     | N           | N                  | N       | N       | N            | N        | N               | X        | X   | X   |
| 6                                                                   | NF                      | F     | 8                                | NA     | N           | N                  | N       | N       | N            | N        | N               | X        | X   | X   |
| 7                                                                   | NF                      | F     | 8.5                              | EF 61% | N           | Y                  | N       | N       | N            | N        | N               | X        | X   | X   |
| 8                                                                   | NF                      | M     | 9                                | NA     | N           | Y                  | N       | N       | N            | N        | N               | X        | X   | X   |
| 9                                                                   | NF                      | F     | 11                               | NA     | N           | Y                  | N       | N       | N            | N        | N               | X        | X   | X   |
| 10                                                                  | NF                      | M     | 12                               | EF 39% | N           | N                  | N       | N       | N            | N        | N               | X        | X   | X   |
| <b>Idiopathic Dilated Cardiomyopathy (n=8)</b>                      |                         |       |                                  |        |             |                    |         |         |              |          |                 |          |     |     |
| 11                                                                  | F                       | M     | 0.1                              | EF 20% | N           | N                  | Y       | N       | N            | Y        | N               | X        | X   | X   |
| 12                                                                  | F                       | M     | 0.6                              | EF 39% | N           | N                  | Y       | Y       | N            | Y        | N               | X        | X   |     |
| 13                                                                  | F                       | F     | 0.8                              | EF 35% | N           | N                  | Y       | Y       | N            | Y        | N               | X        | X   | X   |
| 14                                                                  | F                       | M     | 3.1                              | EF 13% | N           | Y                  | N       | Y       | N            | Y        | N               |          | X   |     |
| 15                                                                  | F                       | M     | 3.8                              | EF 32% | N           | N                  | Y       | Y       | N            | Y        | N               | X        | X   |     |
| 16                                                                  | F                       | F     | 4.4                              | EF 13% | N           | N                  | N       | Y       | N            | Y        | N               | X        | X   | X   |
| 17                                                                  | F                       | M     | 4.6                              | FS 16% | N           | N                  | N       | Y       | N            | Y        | N               | X        | X   | X   |
| 18                                                                  | F                       | F     | 11.4                             | EF 16% | N           | N                  | N       | Y       | N            | Y        | Y               | X        | X   | X   |
| <b>Idiopathic Dilated Cardiomyopathy with PDEi Treatment (n=23)</b> |                         |       |                                  |        |             |                    |         |         |              |          |                 |          |     |     |
| 19                                                                  | FT                      | F     | 0.2                              | EF 13% | Y           | N                  | N       | Y       | N            | Y        | N               | X        |     |     |
| 20                                                                  | FT                      | F     | 0.3                              | EF 21% | Y           | Y                  | N       | Y       | N            | Y        | N               | X        | X   | X   |
| 21                                                                  | FT                      | F     | 0.5                              | EF 19% | Y           | N                  | N       | Y       | N            | Y        | N               | X        |     |     |
| 22                                                                  | FT                      | M     | 0.9                              | EF 16% | Y           | Y                  | Y       | Y       | N            | Y        | N               |          | X   | X   |
| 23                                                                  | FT                      | F     | 0.9                              | EF 30% | Y           | N                  | Y       | Y       | N            | Y        | N               | X        |     |     |
| 24                                                                  | FT                      | M     | 1                                | EF 17% | Y           | N                  | N       | Y       | N            | Y        | N               | X        | X   |     |
| 25                                                                  | FT                      | F     | 1                                | FS 14% | Y           | Y                  | N       | N       | N            | Y        | N               |          | X   |     |
| 26                                                                  | FT                      | F     | 1.4                              | FS 16% | Y           | Y                  | Y       | Y       | N            | Y        | N               | X        | X   |     |
| 27                                                                  | FT                      | M     | 2.3                              | EF 28% | Y           | Y                  | Y       | Y       | N            | Y        | N               | X        | X   |     |
| 28                                                                  | FT                      | F     | 2.4                              | EF 41% | Y           | N                  | Y       | Y       | N            | Y        | N               |          | X   | X   |
| 29                                                                  | FT                      | M     | 2.8                              | EF 15% | Y           | N                  | N       | Y       | N            | Y        | Y               | X        |     |     |
| 30                                                                  | FT                      | M     | 3                                | EF 14% | Y           | N                  | Y       | Y       | N            | Y        | N               | X        |     | X   |
| 31                                                                  | FT                      | F     | 3.1                              | EF 43% | Y           | N                  | Y       | Y       | Y            | Y        | N               | X        | X   | X   |
| 32                                                                  | FT                      | F     | 3.5                              | EF 28% | Y           | N                  | N       | Y       | N            | Y        | N               | X        | X   | X   |
| 33                                                                  | FT                      | F     | 3.8                              | EF 32% | Y           | N                  | Y       | Y       | Y            | Y        | N               | X        | X   | X   |
| 34                                                                  | FT                      | M     | 4.5                              | EF 15% | Y           | N                  | Y       | Y       | NA           | Y        | N               | X        | X   | X   |
| 35                                                                  | FT                      | F     | 9                                | NA     | Y           | N                  | N       | N       | N            | N        | Y               | X        | X   | X   |
| 36                                                                  | FT                      | M     | 9.6                              | EF 21% | Y           | N                  | N       | Y       | N            | Y        | Y               | X        | X   |     |
| 37                                                                  | FT                      | F     | 9.7                              | EF 46% | Y           | Y                  | N       | Y       | Y            | Y        | Y               |          |     | X   |
| 38                                                                  | FT                      | F     | 10.2                             | FS 20% | Y           | N                  | N       | Y       | N            | Y        | N               | X        |     |     |
| 39                                                                  | FT                      | F     | 10.7                             | FS 22% | Y           | N                  | Y       | Y       | Y            | Y        | Y               | X        | X   | X   |
| 40                                                                  | FT                      | F     | 11.6                             | EF 25% | Y           | N                  | N       | N       | N            | Y        | N               | X        |     |     |
| 41                                                                  | FT                      | F     | 11.9                             | EF 25% | Y           | N                  | N       | Y       | N            | Y        | N               | X        | X   | X   |
|                                                                     | NF                      | 50% M | 7.5                              |        |             | 60%                | 0%      | 0%      | 0%           | 0%       | 0%              |          |     |     |
|                                                                     | F                       | 63% M | 3.5                              |        |             | 12%                | 50%     | 88%     | 0%           | 100%     | 13%             |          |     |     |
|                                                                     | FT                      | 30% M | 3.0                              |        |             | 26%                | 43%     | 87%     | 18%          | 96%      | 22%             |          |     |     |
| <b>P-values</b>                                                     |                         |       |                                  |        |             |                    |         |         |              |          |                 |          |     |     |
| <b>NF vs F</b>                                                      |                         | NS    | NS                               |        |             | 0.03               | 0.02    | <0.0001 | NA           | <0.0001  | NS              |          |     |     |
| <b>NF vs FT</b>                                                     |                         | NS    | NS                               |        |             | 0.05               | NS      | <0.0001 | NS           | <0.0001  | NS              |          |     |     |
| <b>F vs FT</b>                                                      |                         | NS    | NS                               |        |             | NS                 | NS      | NS      | NS           | NS       | NS              |          |     |     |

ID = identification, NF = non-failing, F = Failing, FT = Failing Treated with PDEi, M = Male, F = Female, ACEi = angiotensin-converting enzyme inhibitor, PDEi = Phosphodiesterase inhibitor, EF = ejection fraction, FS = fractional shortening, PDE = phosphodiesterase activity, cAMP = cyclic adenosine monophosphate levels, PLB = phospholamban, 3 = PDE3 and Total PDE activity performed (PDE4 activity not performed), NA = not available. NS = not significant. \*Non-PDEi Inotrope includes: dopamine, dobutamine, vasopressin, epinephrine, norepinephrine

**Table S2: Adult Subject Characteristics and Analyses**

| ID                                                                  | Patient Characteristics |     |                                  |        |      | Medications        |         |      |              |          |                 | Analyses |     |     |
|---------------------------------------------------------------------|-------------------------|-----|----------------------------------|--------|------|--------------------|---------|------|--------------|----------|-----------------|----------|-----|-----|
|                                                                     | Group                   | Sex | Age at Tissue Collection (years) | EF/FS  | PDEi | Non-PDEi Inotrope* | Digoxin | ACEi | Beta-Blocker | Diuretic | Anti-arrhythmic | cAMP     | PDE | PLB |
| <b>Non-Failing (n=31)</b>                                           |                         |     |                                  |        |      |                    |         |      |              |          |                 |          |     |     |
| 1                                                                   | NF                      | F   | 24                               | EF 74% | N    | Y                  | N       | N    | N            | N        | N               |          | 3   |     |
| 2                                                                   | NF                      | F   | 36                               | NA     | N    | N                  | N       | N    | N            | N        | N               | X        |     |     |
| 3                                                                   | NF                      | F   | 37                               | EF 60% | N    | Y                  | N       | N    | N            | N        | N               |          | X   |     |
| 4                                                                   | NF                      | M   | 37                               | EF 60% | N    | Y                  | N       | N    | N            | N        | N               | X        | X   |     |
| 5                                                                   | NF                      | M   | 38                               | NA     | N    | Y                  | N       | N    | Y            | N        | N               | X        |     |     |
| 6                                                                   | NF                      | M   | 41                               | EF 60% | N    | Y                  | N       | N    | Y            | N        | N               |          | 3   |     |
| 7                                                                   | NF                      | M   | 43                               | NA     | N    | N                  | N       | N    | Y            | N        | N               | X        |     |     |
| 8                                                                   | NF                      | F   | 44                               | EF 70% | N    | Y                  | N       | N    | Y            | N        | N               |          | 3   |     |
| 9                                                                   | NF                      | F   | 45                               | EF 60% | N    | Y                  | N       | N    | Y            | N        | N               | X        |     |     |
| 10                                                                  | NF                      | M   | 46                               | EF 80% | N    | Y                  | N       | N    | N            | N        | N               | X        | X   | X   |
| 11                                                                  | NF                      | M   | 47                               | EF 55% | N    | Y                  | N       | N    | N            | N        | Y               |          |     | X   |
| 12                                                                  | NF                      | F   | 48                               | EF 55% | N    | Y                  | N       | N    | N            | N        | N               | X        | X   |     |
| 13                                                                  | NF                      | F   | 50                               | EF 70% | N    | N                  | N       | N    | N            | N        | N               | X        | X   |     |
| 14                                                                  | NF                      | M   | 52                               | EF 45% | N    | Y                  | N       | N    | Y            | Y        | N               |          |     | X   |
| 15                                                                  | NF                      | M   | 53                               | EF 70% | N    | Y                  | N       | N    | N            | N        | N               | X        |     | X   |
| 16                                                                  | NF                      | M   | 54                               | NA     | N    | Y                  | N       | Y    | N            | N        | N               |          | X   |     |
| 17                                                                  | NF                      | F   | 54                               | EF 60% | N    | Y                  | N       | N    | Y            | N        | N               | X        |     |     |
| 18                                                                  | NF                      | M   | 54                               | EF 80% | N    | Y                  | N       | N    | N            | N        | N               | X        |     |     |
| 19                                                                  | NF                      | F   | 56                               | EF 68% | N    | Y                  | N       | N    | N            | N        | N               |          |     | X   |
| 20                                                                  | NF                      | F   | 56                               | EF 60% | N    | Y                  | N       | N    | N            | Y        | N               |          |     | X   |
| 21                                                                  | NF                      | F   | 56                               | EF 60% | N    | Y                  | N       | N    | N            | N        | N               |          |     | X   |
| 22                                                                  | NF                      | F   | 56                               | NA     | N    | N                  | N       | N    | N            | Y        | N               | X        |     |     |
| 23                                                                  | NF                      | M   | 57                               | EF 45% | N    | Y                  | N       | Y    | Y            | N        | N               |          | 3   |     |
| 24                                                                  | NF                      | F   | 58                               | EF 65% | N    | Y                  | N       | N    | N            | N        | N               |          | X   |     |
| 25                                                                  | NF                      | F   | 58                               | NA     | N    | N                  | N       | N    | N            | N        | N               | X        | X   |     |
| 26                                                                  | NF                      | M   | 61                               | EF 60% | N    | Y                  | N       | N    | N            | N        | N               | X        |     | X   |
| 27                                                                  | NF                      | F   | 61                               | EF 55% | N    | Y                  | N       | N    | N            | Y        | N               |          |     | X   |
| 28                                                                  | NF                      | M   | 64                               | NA     | N    | Y                  | N       | N    | N            | N        | N               |          | 3   |     |
| 29                                                                  | NF                      | M   | 65                               | EF 60% | N    | N                  | N       | Y    | N            | N        | N               | X        | X   |     |
| 30                                                                  | NF                      | M   | 69                               | EF 60% | N    | Y                  | N       | N    | Y            | N        | N               |          |     | X   |
| 31                                                                  | NF                      | NA  | NA                               | NA     | N    | N                  | N       | N    | N            | N        | N               |          | X   |     |
| <b>Idiopathic Dilated Cardiomyopathy (n=26)</b>                     |                         |     |                                  |        |      |                    |         |      |              |          |                 |          |     |     |
| 32                                                                  | F                       | M   | 20                               | FS 11% | N    | N                  | N       | Y    | N            | Y        | N               | X        |     |     |
| 33                                                                  | F                       | M   | 21                               | FS 9%  | N    | N                  | N       | Y    | Y            | Y        | N               | X        |     | X   |
| 34                                                                  | F                       | M   | 24                               | NA     | N    | NA                 | Y       | Y    | NA           | Y        | NA              | X        |     |     |
| 35                                                                  | F                       | M   | 26                               | EF 13% | N    | Y                  | Y       | Y    | N            | Y        | N               |          | 3   |     |
| 36                                                                  | F                       | M   | 26                               | EF 15% | N    | N                  | Y       | N    | N            | Y        | Y               | X        |     |     |
| 37                                                                  | F                       | M   | 31                               | EF 11% | N    | Y                  | Y       | N    | N            | Y        | Y               | X        | X   |     |
| 38                                                                  | F                       | F   | 34                               | EF 18% | N    | NA                 | NA      | NA   | Y            | Y        | NA              | X        |     |     |
| 39                                                                  | F                       | M   | 40                               | EF 13% | N    | N                  | Y       | Y    | N            | Y        | N               | X        | X   |     |
| 40                                                                  | F                       | M   | 41                               | FS 14% | N    | N                  | Y       | Y    | Y            | Y        | N               | X        | X   | X   |
| 41                                                                  | F                       | F   | 41                               | EF 15% | N    | NA                 | Y       | Y    | NA           | Y        | NA              | X        |     |     |
| 42                                                                  | F                       | M   | 43                               | FS 14% | N    | Y                  | N       | Y    | N            | Y        | N               |          |     | X   |
| 43                                                                  | F                       | F   | 46                               | EF 20% | N    | N                  | Y       | Y    | N            | Y        | N               | X        |     |     |
| 44                                                                  | F                       | M   | 47                               | EF 8%  | N    | N                  | Y       | N    | Y            | Y        | N               | X        | X   |     |
| 45                                                                  | F                       | M   | 49                               | EF 20% | N    | Y                  | Y       | N    | N            | Y        | Y               |          | 3   |     |
| 46                                                                  | F                       | M   | 51                               | FS 10% | N    | Y                  | Y       | N    | N            | Y        | Y               | X        | X   |     |
| 47                                                                  | F                       | F   | 52                               | EF 20% | N    | Y                  | Y       | N    | N            | Y        | N               |          | X   | X   |
| 48                                                                  | F                       | M   | 55                               | FS 27% | N    | N                  | N       | N    | Y            | Y        | N               |          | 3   |     |
| 49                                                                  | F                       | F   | 57                               | EF 18% | N    | N                  | N       | N    | Y            | Y        | N               | X        | X   |     |
| 50                                                                  | F                       | M   | 57                               | FS 15% | N    | N                  | Y       | Y    | N            | Y        | Y               | X        | X   | X   |
| 51                                                                  | F                       | F   | 59                               | EF 15% | N    | N                  | N       | N    | N            | N        | N               |          | X   |     |
| 52                                                                  | F                       | F   | 59                               | NA     | N    | N                  | N       | N    | N            | Y        | N               |          |     | X   |
| 53                                                                  | F                       | M   | 59                               | NA     | N    | NA                 | Y       | Y    | NA           | Y        | NA              | X        |     |     |
| 54                                                                  | F                       | F   | 60                               | EF 8%  | N    | N                  | Y       | Y    | NA           | Y        | N               | X        |     |     |
| 55                                                                  | F                       | M   | 62                               | EF 9%  | N    | N                  | Y       | Y    | N            | Y        | N               | X        | X   |     |
| 56                                                                  | F                       | M   | 63                               | FS 9%  | N    | N                  | Y       | Y    | Y            | Y        | N               |          |     | X   |
| 57                                                                  | F                       | M   | 65                               | EF 7%  | N    | N                  | Y       | Y    | Y            | Y        | N               | X        |     | X   |
| <b>Idiopathic Dilated Cardiomyopathy with PDEi Treatment (n=31)</b> |                         |     |                                  |        |      |                    |         |      |              |          |                 |          |     |     |
| 58                                                                  | FT                      | M   | 20                               | EF 10% | Y    | Y                  | Y       | N    | N            | Y        | N               | X        | X   | X   |
| 59                                                                  | FT                      | M   | 22                               | EF 11% | Y    | NA                 | Y       | Y    | Y            | Y        | NA              | X        |     |     |
| 60                                                                  | FT                      | F   | 26                               | NA     | Y    | NA                 | NA      | NA   | NA           | NA       | NA              | X        | X   |     |
| 61                                                                  | FT                      | M   | 28                               | EF 10% | Y    | Y                  | N       | N    | N            | Y        | Y               | X        | X   | X   |
| 62                                                                  | FT                      | M   | 29                               | EF 15% | Y    | Y                  | NA      | NA   | NA           | NA       | NA              | X        |     |     |
| 63                                                                  | FT                      | M   | 34                               | EF 20% | Y    | Y                  | Y       | N    | N            | N        | N               | X        | X   |     |
| 64                                                                  | FT                      | M   | 38                               | EF 16% | Y    | Y                  | N       | N    | N            | Y        | N               |          | X   | X   |
| 65                                                                  | FT                      | M   | 38                               | NA     | Y    | Y                  | NA      | NA   | NA           | NA       | NA              | X        | X   |     |
| 66                                                                  | FT                      | M   | 39                               | EF 12% | Y    | Y                  | Y       | N    | N            | Y        | Y               | X        | X   | X   |
| 67                                                                  | FT                      | M   | 39                               | EF 10% | Y    | Y                  | Y       | Y    | NA           | Y        | NA              | X        | X   |     |
| 68                                                                  | FT                      | M   | 40                               | EF 9%  | Y    | N                  | Y       | Y    | Y            | Y        | N               | X        | X   | X   |
| 69                                                                  | FT                      | M   | 42                               | NA     | Y    | NA                 | Y       | Y    | NA           | Y        | NA              | X        |     |     |
| 70                                                                  | FT                      | M   | 43                               | EF 11% | Y    | Y                  | NA      | Y    | NA           | Y        | NA              | X        |     |     |
| 71                                                                  | FT                      | M   | 46                               | NA     | Y    | NA                 | NA      | NA   | NA           | NA       | NA              | X        | X   |     |
| 72                                                                  | FT                      | M   | 46                               | NA     | Y    | NA                 | NA      | NA   | Y            | NA       | NA              | X        |     |     |
| 73                                                                  | FT                      | M   | 46                               | EF 15% | Y    | Y                  | NA      | Y    | NA           | Y        | NA              | X        |     |     |
| 74                                                                  | FT                      | M   | 51                               | NA     | Y    | NA                 | NA      | NA   | NA           | NA       | NA              | X        |     |     |
| 75                                                                  | FT                      | M   | 52                               | NA     | Y    | NA                 | Y       | NA   | NA           | NA       | NA              |          | X   |     |
| 76                                                                  | FT                      | M   | 52                               | EF 10% | Y    | N                  | Y       | Y    | N            | Y        | N               | X        | X   |     |
| 77                                                                  | FT                      | F   | 52                               | NA     | Y    | Y                  | Y       | Y    | NA           | Y        | NA              | X        |     |     |
| 78                                                                  | FT                      | M   | 53                               | NA     | Y    | N                  | N       | N    | Y            | N        | N               | X        | X   | X   |
| 79                                                                  | FT                      | M   | 56                               | EF 16% | Y    | Y                  | N       | Y    | N            | N        | N               | X        | X   |     |

|                 |           |               |           |               |          |           |           |           |           |           |           |          |          |          |
|-----------------|-----------|---------------|-----------|---------------|----------|-----------|-----------|-----------|-----------|-----------|-----------|----------|----------|----------|
| <b>80</b>       | <b>FT</b> | <b>F</b>      | <b>56</b> | <b>NA</b>     | <b>Y</b> | <b>Y</b>  | <b>NA</b> | <b>NA</b> | <b>NA</b> | <b>NA</b> | <b>NA</b> | <b>X</b> | <b>X</b> | <b>X</b> |
| <b>81</b>       | <b>FT</b> | <b>M</b>      | <b>56</b> | <b>EF 21%</b> | <b>Y</b> | <b>Y</b>  | <b>NA</b> | <b>NA</b> | <b>NA</b> | <b>NA</b> | <b>Y</b>  | <b>X</b> |          |          |
| <b>82</b>       | <b>FT</b> | <b>M</b>      | <b>56</b> | <b>EF 16%</b> | <b>Y</b> | <b>N</b>  | <b>Y</b>  | <b>Y</b>  | <b>Y</b>  | <b>Y</b>  | <b>N</b>  | <b>X</b> |          |          |
| <b>83</b>       | <b>FT</b> | <b>F</b>      | <b>59</b> | <b>NA</b>     | <b>Y</b> | <b>NA</b> | <b>NA</b> | <b>NA</b> | <b>NA</b> | <b>NA</b> | <b>NA</b> | <b>X</b> | <b>X</b> | <b>X</b> |
| <b>84</b>       | <b>FT</b> | <b>F</b>      | <b>59</b> | <b>NA</b>     | <b>Y</b> | <b>NA</b> | <b>NA</b> | <b>NA</b> | <b>NA</b> | <b>NA</b> | <b>NA</b> | <b>X</b> |          |          |
| <b>85</b>       | <b>FT</b> | <b>M</b>      | <b>61</b> | <b>NA</b>     | <b>Y</b> | <b>NA</b> | <b>NA</b> | <b>NA</b> | <b>NA</b> | <b>NA</b> | <b>NA</b> | <b>X</b> | <b>X</b> |          |
| <b>86</b>       | <b>FT</b> | <b>M</b>      | <b>61</b> | <b>NA</b>     | <b>Y</b> | <b>NA</b> | <b>NA</b> | <b>NA</b> | <b>NA</b> | <b>NA</b> | <b>NA</b> | <b>X</b> |          |          |
| <b>87</b>       | <b>FT</b> | <b>M</b>      | <b>65</b> | <b>NA</b>     | <b>Y</b> | <b>Y</b>  | <b>NA</b> | <b>Y</b>  | <b>NA</b> | <b>Y</b>  | <b>NA</b> | <b>X</b> | <b>X</b> |          |
| <b>88</b>       | <b>FT</b> | <b>M</b>      | <b>66</b> | <b>EF 10%</b> | <b>Y</b> | <b>N</b>  | <b>N</b>  | <b>Y</b>  | <b>N</b>  | <b>Y</b>  | <b>Y</b>  | <b>X</b> |          | <b>X</b> |
|                 | <b>NF</b> | <b>47% M</b>  | <b>54</b> |               |          |           |           |           |           |           |           |          |          |          |
|                 | <b>F</b>  | <b>69% M</b>  | <b>48</b> |               |          |           |           |           |           |           |           |          |          |          |
|                 | <b>FT</b> | <b>84% M</b>  | <b>46</b> |               |          |           |           |           |           |           |           |          |          |          |
| <b>P-values</b> |           |               |           |               |          |           |           |           |           |           |           |          |          |          |
| <b>NF vs F</b>  |           | <b>NS</b>     | <b>NS</b> |               |          |           |           |           |           |           |           |          |          |          |
| <b>NF vs FT</b> |           | <b>0.0045</b> | <b>NS</b> |               |          |           |           |           |           |           |           |          |          |          |
| <b>F vs FT</b>  |           | <b>NS</b>     | <b>NS</b> |               |          |           |           |           |           |           |           |          |          |          |

ID = identification, NF = non-failing, F = Failing, FT = Failing Treated with PDEi, M = Male, F = Female, ACEi = angiotensin-converting enzyme inhibitor, PDEi = Phosphodiesterase inhibitor, EF = ejection fraction, FS = fractional shortening, PDE = phosphodiesterase activity, cAMP = cyclic adenosine monophosphate levels, PLB = phospholamban, 3 = PDE3 and Total PDE activity performed (PDE4 activity not performed), NA = not available. NS = not significant. \*Non-PDEi Inotrope includes: dopamine, dobutamine, vasopressin, epinephrine, norepinephrine
